# Supplementary material for: Fluorescence Photobleaching as an Intrinsic Tool to Quantify the 3D Expansion Factor of Biological Samples in Expansion Microscopy
Source: PubMed Central journal article supplement (PMC7114699; doi:10.1021/acsomega.0c00118), 2020-03-17
Supplement: ao0c00118_si_001.pdf [file ao0c00118_si_001.pdf]

## Supporting Information

### **Fluorescence photobleaching as an intrinsic tool to quantify the 3D expansion factor of biological samples in expansion microscopy**

Marisa Vanheusden, Raffaele Vitale, Rafael Camacho,<sup>†</sup> Kris P.F. Janssen,<sup>‡</sup> Aline Acke, Susana Rocha,\* Johan Hofkens\*

Department of Chemistry, KU Leuven, Leuven, Belgium

#### **AUTHOR INFORMATION**

\* e-mail correspondence to :    susana.rocha@kuleuven.be  
                                                  johan.hofkens@kuleuven.be

## Table of Contents

|                                                                                                          |           |
|----------------------------------------------------------------------------------------------------------|-----------|
| <b>Figure S1:</b> Orthogonal views of thresholded cube.....                                              | <b>S3</b> |
| <b>Figure S2:</b> Number of internal pixels along x as a function of the pixel line .....                | <b>S3</b> |
| <b>Figure S3:</b> Photobleaching in a nuclear DAPI staining .....                                        | <b>S4</b> |
| <b>Table S1:</b> Cubes that were classified as being isotropic in 3D using the presented approach. ....  | <b>S4</b> |
| <b>Figure S4:</b> Cubes that were classified as being isotropic in 3D using the presented approach ..... | <b>S5</b> |
| <b>Script used in Fiji</b> for segmentation and expansion factor calculation .....                       | <b>S6</b> |

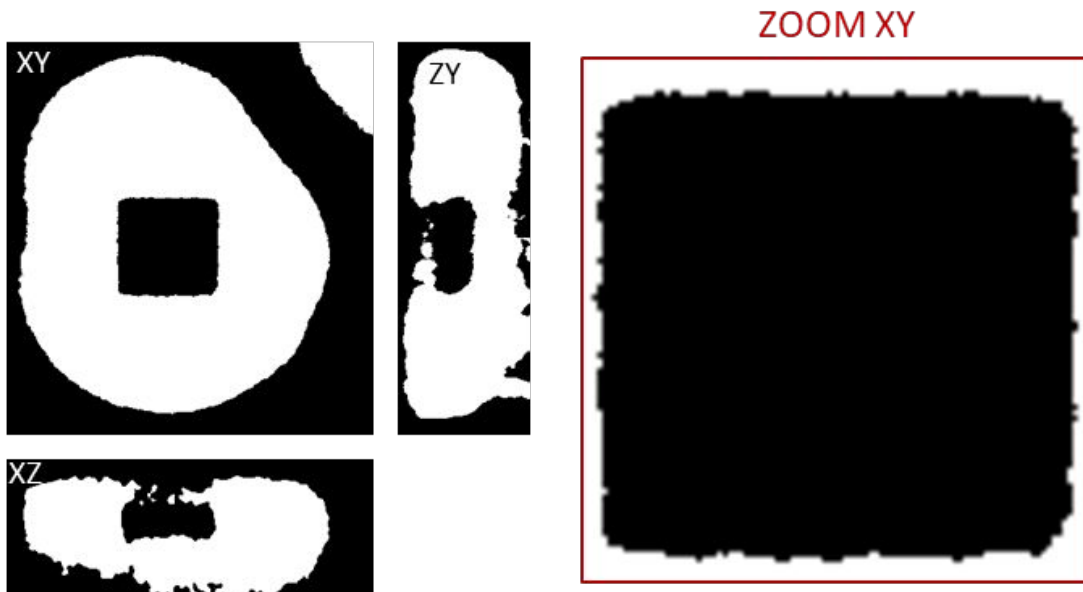

**Figure S1:** Thresholded version of the cube represented in figure 3. Edges of the cube typically display pixel lines with only a few black pixels, which results in outliers in the distribution of the local expansion factor (excluded from the subsequent data processing for the sake of a better visualization).

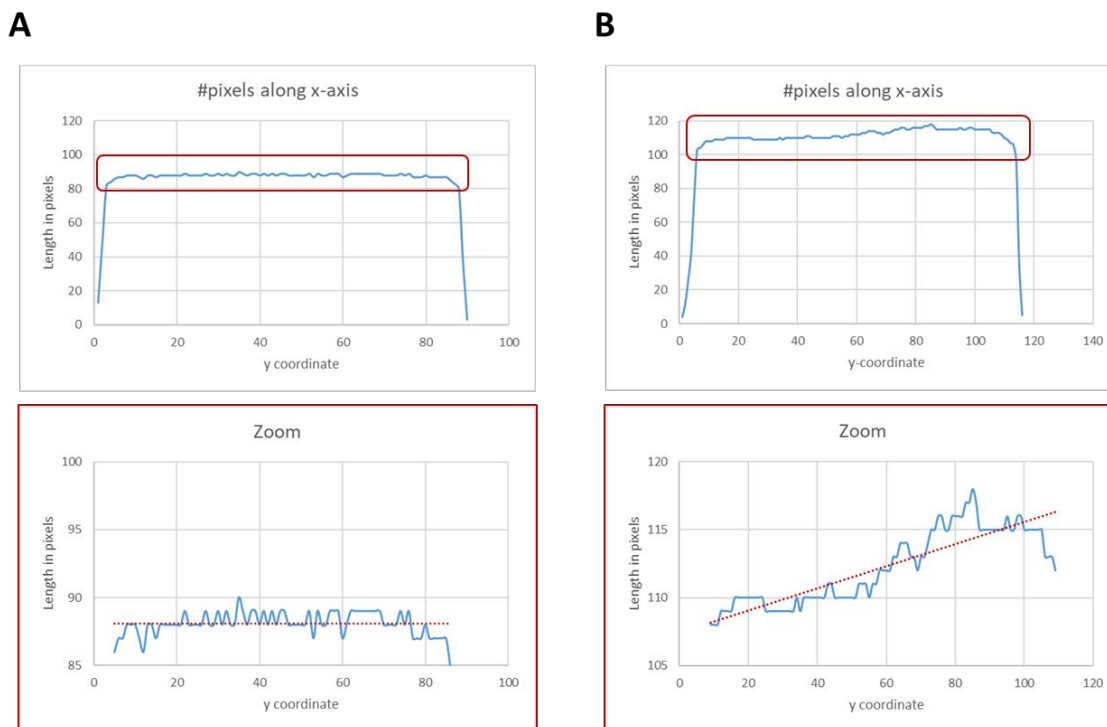

**Figure S2:** Number of internal pixels along  $x$  as a function of the pixel line for A) the isotropic square represented in figure 3 and B) the square exhibiting local distortions displayed in figure 4. Slopes of the fitted trendlines are for A) 0.0003 and for B) 0.081.

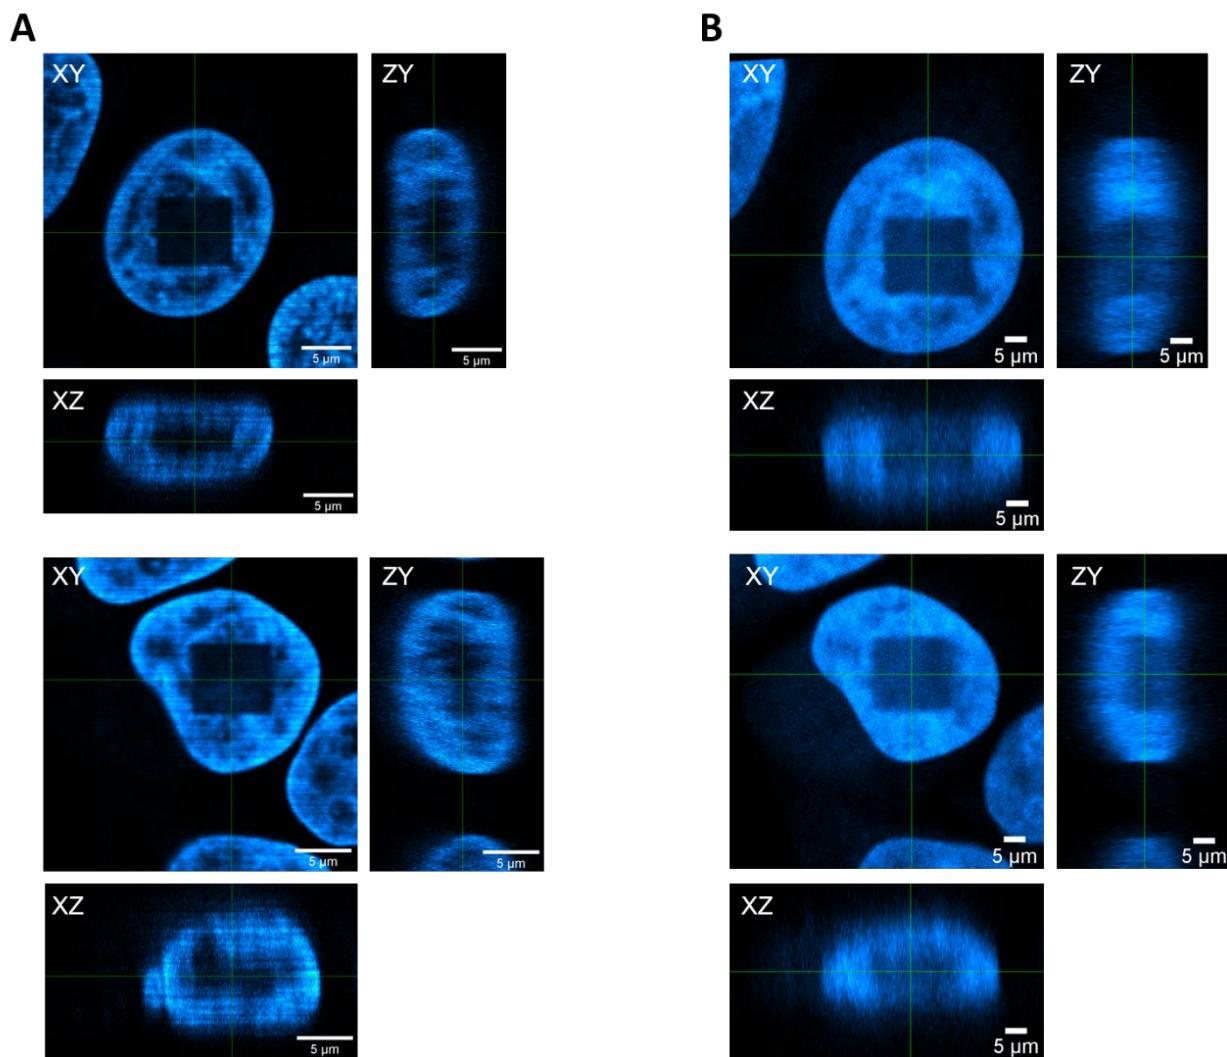

**Figure S3:** A) Pre- and B) post-expansion fluorescence photobleached cubes in the nucleus of DAPI stained cells.

**Table S1:** Median expansion factors and respective median absolute deviations along  $x$ ,  $y$  and  $z$  for 3 isotropically expanded photobleached cubes in three different cells. Here, isotropy along  $x$  and  $y$  was found to be concomitant with isotropy along  $z$ .

|                  | Cube 1 |      |      | Cube 2 |      |      | Cube 3 |      |      |
|------------------|--------|------|------|--------|------|------|--------|------|------|
| Dimension        | X      | Y    | Z    | X      | Y    | Z    | X      | Y    | Z    |
| <b>n</b>         | 102    | 105  | 193  | 62     | 65   | 123  | 106    | 116  | 212  |
| <b>Median EF</b> | 4.94   | 4.91 | 4.86 | 5.35   | 5.59 | 5.52 | 4.17   | 4.13 | 3.96 |
| <b>MAD</b>       | 0.05   | 0.05 | 0.35 | 0.08   | 0.08 | 0.69 | 0.04   | 0.04 | 0.31 |

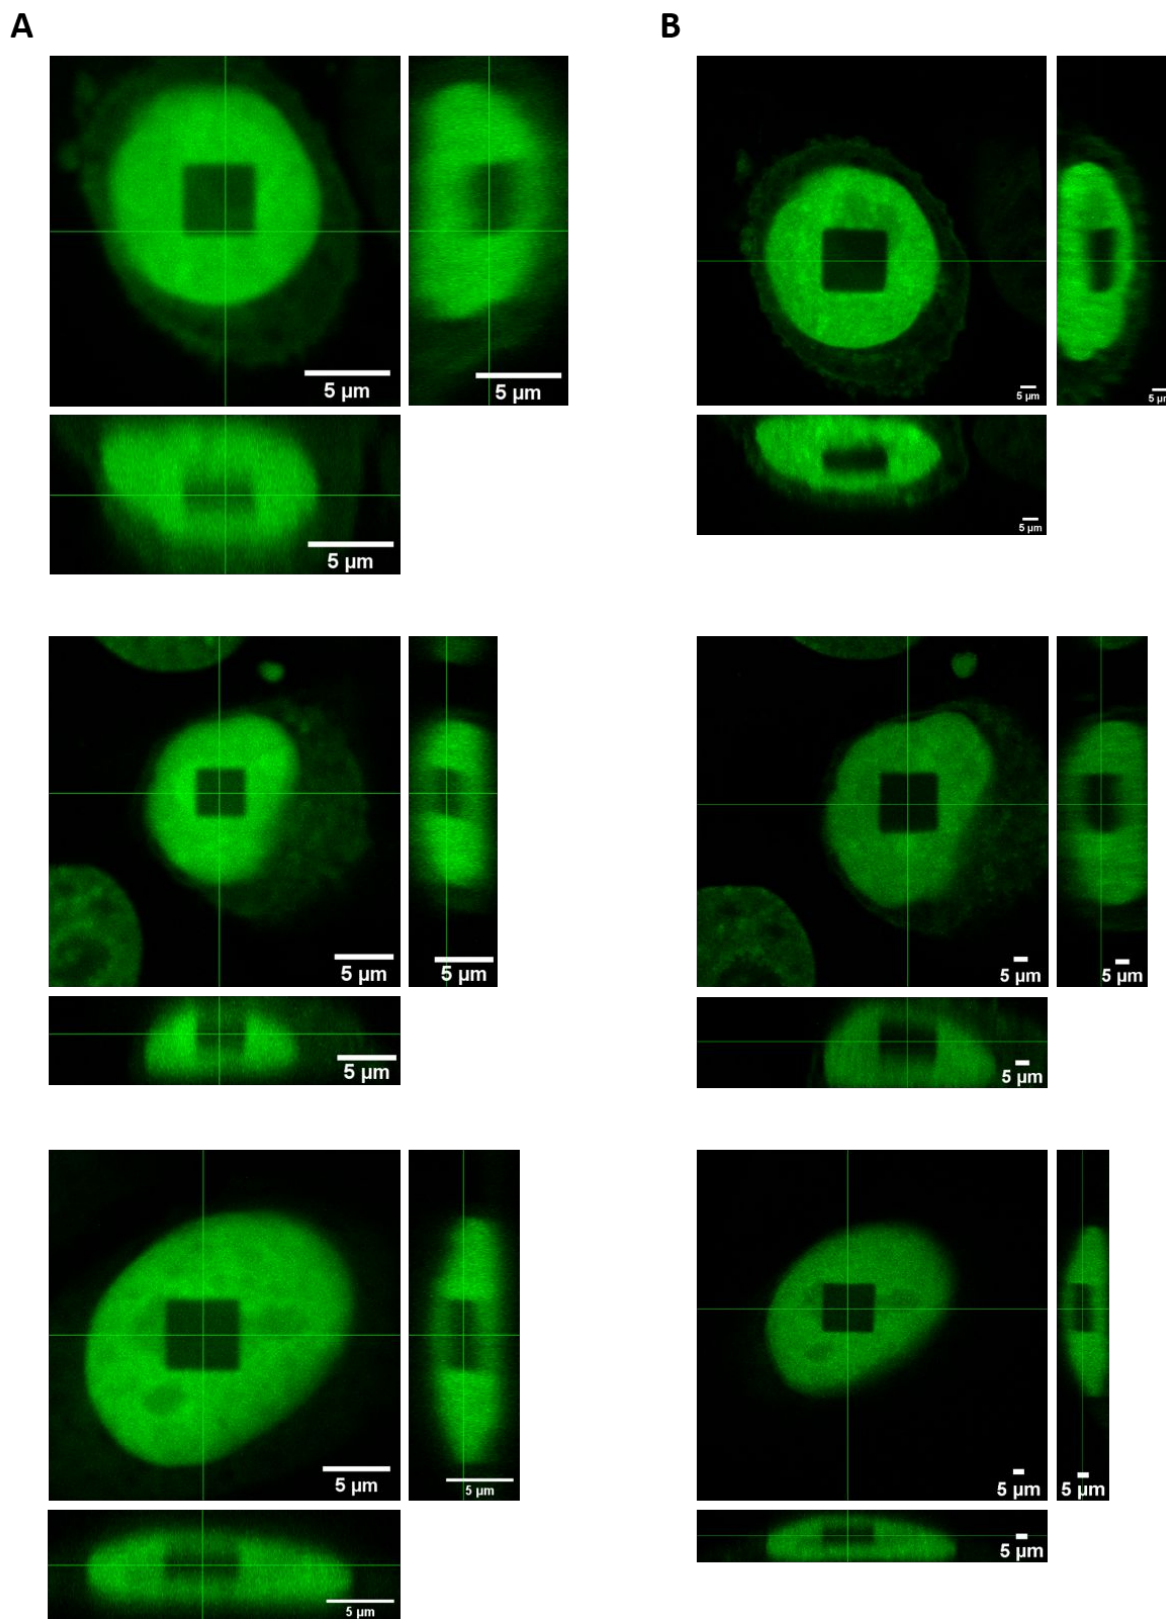

**Figure S4:** 3 Additional examples of isotropically expanded cubes represented in table 1. A) Pre- and B) post-expansion orthogonal views of cell 1 (upper panel), cell 2 (middle panel) and cell 3 (lower panel).

**Script used in Fiji for counting pixels after the plane was selected which you want to use for downstream analysis and after post-processing of the image (see materials and methods for details):**

**// Pre-ExM**

```
run("Analyze Particles...", "size=100-Infinity pixel display exclude clear add");
// In the case that more ROI's are found, manually remove the ROI's which are not representing // the
square
roiManager("Select", 0);
getSelectionBounds(x, y, width, height)
makeRectangle(x, y, width, height)
run("Crop");
rename("PRE")
```

**//Post-ExM**

```
run("Analyze Particles...", "size=100-Infinity pixel display exclude clear add");
// In the case that more ROI's are found, manually remove the ROI's which are not representing // the
square
roiManager("Select", 0);
getSelectionBounds(x, y, width, height)
makeRectangle(x, y, width, height)
run("Crop");
rename("POST")
```

**//rescale images**

```
selectWindow("PRE")
heightPRE = getHeight()
widthPRE = getWidth()
selectWindow("POST")
heightPOST = getHeight()
widthPOST = getWidth()
if (heightPOST>heightPRE) {
    run("Size...", "width=widthPRE height=heightPRE depth=1 average interpolation=Bilinear");
}
if (heightPOST<heightPRE) {
    selectWindow("PRE")
    run("Size...", "width=widthPOST height=heightPOST depth=1 average interpolation=Bilinear");
}
setAutoThreshold()
run("Convert to Mask")
```

**//Returns the number of times the value occurs within line y pre-expansion**

```
selectWindow("PRE")
```

```

getDimensions(width, height, channels, slices, frames)
for (i=0; i<height; i++) {
    countX=0;
    for (a=0; a<width; a++) {
        if (getPixel(a,i)==0) {
            countX++;
        }
    }
}
setResult("countX", i, countX);}

```

**//Returns the actual dimensions in X pre-expansion**

```

getPixelSize(unit, pixelWidth, pixelHeight)
dimensionX=0
for (i = 0; i < nResults; i++) {
    dimensionX= getResult("countX", i)*pixelWidth;
    setResult("dimensionX", i, dimensionX);}

```

**//Returns the number of times the value occurs within row x pre-expansion**

```

getDimensions(width, height, channels, slices, frames)
for (i=0; i<width; i++) {
    countY=0;
    for (a=0; a<height; a++) {
        if (getPixel(i,a)==0) {
            countY++;
        }
    }
}
setResult("countY", i, countY);}

```

**//Returns the actual dimension in Y pre-expansion**

```

dimensionY=0
for (i = 0; i < nResults; i++) {
    dimensionY= getResult("countY", i)*pixelHeight;
    setResult("dimensionY", i, dimensionY);}

```

**//Returns the number of times the value occurs within line y post-expansion**

```

selectWindow("POST")
getDimensions(width, height, channels, slices, frames)
for (i=0; i<height; i++) {
    countXpost=0;
    for (a=0; a<width; a++) {

```

```

    if (getPixel(a,i)==0) {
        countXpost++;
    }
}
setResult("countXpost", i, countXpost);}

```

**//Returns the actual dimensions in X post-expansion**

```

getPixelSize(unit, pixelWidth, pixelHeight)
dimensionXpost=0
for (i = 0; i < nResults; i++) {
    dimensionXpost= getResult("countXpost", i)*pixelWidth;
    setResult("dimensionXpost", i, dimensionXpost);}

```

**//Returns the number of times the value occurs within row x post-expansion**

```

getDimensions(width, height, channels, slices, frames)
for (i=0; i<width; i++) {
    countYpost=0;
    for (a=0; a<height; a++) {
        if (getPixel(i,a)==0) {
            countYpost++;
        }
    }
}
setResult("countYpost", i, countYpost);}

```

**//Returns the actual dimension in Y post-expansion**

```

dimensionYpost=0
for (i = 0; i < nResults; i++) {
    dimensionYpost= getResult("countYpost", i)*pixelHeight;
    setResult("dimensionYpost", i, dimensionYpost);}

```

**//calculate expansion factor X and expansion factor Y for each line**

```

ExpansionfactorX=0
for (i = 0; i < nResults; i++) {
    ExpansionfactorX=getResult("dimensionXpost", i)/getResult("dimensionX", i);
    setResult("ExpansionfactorX", i, ExpansionfactorX);
}

```

```

ExpansionfactorY=0
for (i = 0; i < nResults; i++) {
    ExpansionfactorY=getResult("dimensionYpost", i)/getResult("dimensionY", i);
    setResult("ExpansionfactorY", i, ExpansionfactorY);
}

```
